# Supplementary material for: Fluorescent secreted bacterial effectors reveal active intravacuolar proliferation of Listeria monocytogenes in epithelial cells
Source: PLoS Pathog. 2020 Oct 12;16(10):e1009001. doi: 10.1371/journal.ppat.1009001 (PMC7580998; doi:10.1371/journal.ppat.1009001)
Supplement: S5 Table — (XLSX) [file ppat.1009001.s023.xlsx]

## Sheet: Fig 3C — lifetimes
	Vacuole lifetime (min)
#	WT	∆hlyA
1	5	5
2	5	5
3	5	5
4	5	5
5	5	5
6	5	5
7	5	5
8	5	5
9	5	5
10	5	5
11	5	5
12	5	5
13	5	5
14	5	5
15	5	5
16	5	5
17	5	5
18	5	5
19	5	5
20	5	5
21	5	5
22	5	5
23	5	5
24	5	5
25	5	5
26	5	5
27	5	5
28	5	5
29	5	5
30	5	5
31	5	5
32	5	10
33	5	10
34	5	10
35	5	10
36	5	10
37	5	10
38	5	10
39	5	10
40	5	10
41	5	10
42	5	10
43	5	10
44	5	10
45	5	10
46	5	10
47	5	10
48	5	10
49	5	10
50	5	10
51	5	10
52	5	10
53	5	10
54	5	10
55	5	10
56	5	10
57	5	10
58	5	10
59	5	10
60	5	10
61	5	10
62	5	10
63	5	10
64	5	10
65	5	10
66	5	10
67	5	10
68	5	10
69	5	10
70	5	10
71	5	10
72	5	10
73	5	10
74	10	10
75	10	10
76	10	15
77	10	15
78	10	15
79	10	15
80	10	15
81	10	15
82	10	15
83	10	15
84	10	15
85	10	15
86	10	15
87	10	15
88	10	15
89	10	15
90	10	15
91	10	15
92	10	15
93	10	15
94	10	15
95	10	15
96	10	15
97	10	15
98	10	15
99	10	15
100	10	15
101	10	15
102	10	15
103	10	15
104	10	15
105	10	15
106	10	15
107	10	15
108	10	15
109	10	15
110	10	15
111	10	15
112	10	15
113	10	15
114	10	15
115	10	15
116	10	15
117	10	15
118	10	15
119	10	15
120	10	15
121	10	15
122	10	15
123	10	15
124	10	15
125	10	15
126	10	20
127	10	20
128	10	20
129	10	20
130	10	20
131	10	20
132	10	20
133	10	20
134	10	20
135	10	20
136	10	20
137	10	20
138	10	20
139	10	20
140	10	20
141	15	20
142	15	20
143	15	20
144	15	20
145	15	20
146	15	20
147	15	20
148	15	20
149	15	20
150	15	20
151	15	20
152	15	20
153	15	20
154	15	20
155	15	20
156	15	20
157	15	20
158	15	20
159	15	20
160	15	20
161	15	20
162	15	20
163	15	20
164	15	25
165	15	25
166	15	25
167	15	25
168	15	25
169	15	25
170	15	25
171	15	25
172	15	25
173	15	25
174	15	25
175	15	25
176	15	25
177	15	25
178	20	25
179	20	25
180	20	25
181	20	25
182	20	25
183	20	25
184	20	25
185	20	25
186	20	25
187	20	25
188	20	25
189	20	25
190	20	25
191	20	30
192	20	30
193	20	30
194	20	30
195	20	30
196	20	30
197	25	30
198	25	30
199	25	30
200	25	30
201	25	30
202	25	30
203	25	30
204	25	30
205	25	35
206	25	35
207	25	35
208	25	35
209	25	35
210	30	35
211	30	35
212	30	35
213	30	35
214	30	35
215	30	35
216	30	35
217	30	35
218	30	35
219	30	35
220	35	35
221	35	35
222	35	40
223	35	40
224	35	40
225	35	40
226	35	40
227	40	40
228	40	40
229	40	40
230	40	40
231	40	40
232	40	40
233	40	45
234	40	45
235	45	45
236	45	45
237	45	45
238	45	45
239	45	45
240	45	45
241	45	50
242	50	50
243	50	50
244	50	50
245	50	50
246	50	50
247	55	55
248	55	55
249	60	55
250	60	55
251	65	55
252	65	55
253	75	55
254	75	55
255	75	55
256	80	55
257	80	55
258	80	55
259	85	55
260	95	55
261	95	65
262	95	65
263	105	65
264	105	75
265	115	75
266	125	80
267	125	85
268	135	95
269	140	95
270	145	100
271	150	100
272	200	105
273	210	105
274	215	110
275	215	110
276	215	120
277	220	135
278	230	135
279	265	145
280	265	150
281	270	150
282	285	155
283	300	160
284	315	165
285		175
286		180
287		185
288		190
289		190
290		230
291		235
292		240
293		245
294		245
295		250
296		255
297		260
298		260
299		265
300		265
301		270
302		270
303		275
304		300
305		310

## Sheet: Fig 3C — distribution
	Number of vacuoles
Vacuole lifetime (min)	WT	∆hlyA
5	73	31
10	67	44
15	37	50
20	19	38
25	13	27
30	10	14
35	7	17
40	8	11
45	7	8
50	5	6
55	2	14
60	2	0
65	2	3
70	0	0
75	3	2
80	3	1
85	1	1
90	0	0
95	3	2
100	0	2
105	2	2
110	0	2
115	1	0
120	0	1
125	2	0
130	0	0
135	1	2
140	1	0
145	1	1
150	1	2
155	0	1
160	0	1
165	0	1
170	0	0
175	0	1
180	0	1
185	0	1
190	0	2
195	0	0
200	1	0
205	0	0
210	1	0
215	3	0
220	1	0
225	0	0
230	1	1
235	0	1
240	0	1
245	0	2
250	0	1
255	0	1
260	0	2
265	2	2
270	1	2
275	0	1
280	0	0
285	1	0
290	0	0
295	0	0
300	1	1
305	0	0
310	0	1
315	1	0
Total	284	305
